# Supplementary material for: Ectopic Expression of a WRKY Homolog from Glycine soja Alters Flowering Time in Arabidopsis
Source: PubMed Central journal article supplement (PMC3753250; doi:10.1371/journal.pone.0073295), 2013-08-26
Supplement: pone.0073295.s001.pdf [file pone.0073295.s001.pdf]

**Locus or Accession number of the genes**

| <b>Gene symbol</b> | <b>Gene locus or<br/>Accession number</b> | <b>Gene symbol</b> | <b>Gene locus or<br/>Accession number</b> |
|--------------------|-------------------------------------------|--------------------|-------------------------------------------|
| <i>GAPDH</i>       | DQ355800                                  | <i>AtWRKY12</i>    | AT2G44745                                 |
| <i>ACTIN2</i>      | AT3G18780                                 | <i>AtWRKY53</i>    | AT4G23810                                 |
| <i>FLC</i>         | AT5G10140                                 | <i>AtWRKY63</i>    | AT1G66600                                 |
| <i>CO</i>          | AT5G15840                                 | <i>AtWRKY70</i>    | AT3G56400                                 |
| <i>SOC1</i>        | AT2G45660                                 | <i>AtWRKY75</i>    | AT5G13080                                 |
| <i>FT</i>          | AT1G65480                                 | <i>TaWRKY5</i>     | EU665434.1                                |
| <i>API</i>         | AT1G69120                                 | <i>TaWRKY11</i>    | EU665440                                  |
| <i>SEP3</i>        | AT1G24260                                 | <i>OsWRKY45</i>    | GQ331932                                  |
| <i>AP3</i>         | AT3G54340                                 | <i>OsWRKY61</i>    | BK005064                                  |
| <i>AG</i>          | AT4G18960                                 | <i>OsWRKY71</i>    | AB190817.1                                |
| <i>PI</i>          | AT5G20240                                 | <i>OsWRKY78</i>    | BK005212                                  |
| <i>SPL4</i>        | AT1G53160                                 | <i>OsWRKY89</i>    | AY781112.1                                |
| <i>PRE1</i>        | AT5G39860                                 | <i>GmWRKY60</i>    | EU375357                                  |
| <i>EXL4</i>        | AT1G75910                                 | <i>GhWRKY15</i>    | HQ651070.1                                |
| <i>EXL6</i>        | AT1G75930                                 | <i>TcWRKY53</i>    | EF053036                                  |
| <i>CYP77A6</i>     | AT3G10570                                 | <i>ScWRKY1</i>     | AY366389                                  |
| <i>ACS2</i>        | AT1G01480                                 | <i>SUSIBA2</i>     | AY323206.1                                |
| <i>AtWRKY4</i>     | AT1G80840                                 | <i>MINISEED3</i>   | NM_104436.2                               |
| <i>AtWRKY6</i>     | AT1G62300                                 | <i>MtSTP</i>       | HM622067                                  |
| <i>AtWRKY11</i>    | AT4G31550                                 | <i>TTG2</i>        | AF516172                                  |

**Gene-specific primers used for RT-PCR assays**

| <b>Gene name</b> | <b>Primer Sequence (5' to 3')</b>                                        |
|------------------|--------------------------------------------------------------------------|
| <i>GsWRKY20</i>  | Forward:GGCCATCAAGGATCACCATAAT-3'<br>Reverse: GGCTCCAAGGATGTCTTTCTGA-3'  |
| <i>GAPDH</i>     | Forward: GACTGGTATGGCATTCCGTGT<br>Reverse: GCCCTCTGATTCCCTCCTTGA         |
| <i>ACTIN2</i>    | Forward:TTACCCGATGGGCAAGTC<br>Reverse: GTCATACGGTCAGCGATAC               |
| <i>FLC</i>       | Forward: GCTTTCTGTTCTCTGTGACGCA<br>Reverse: CTCCAGTTGAACAAGAGCATCG       |
| <i>CO</i>        | Forward: GCTCCACACCATCAAACCTTACT<br>Reverse: CGATTGGCAGAGTGAACCTTGAG     |
| <i>SOC1</i>      | Forward: ACACAAATAGATGAAACGAGGAAAG<br>Reverse: GATAAAAACCTAACCAGGAGGAAGC |
| <i>FT</i>        | Forward: ACAATCAACACAGAGAAACCACCT<br>Reverse: CCTGAGGTCTTCTCCACCAATC     |
| <i>AP1</i>       | Forward: GCAAGCAATGAGCCCTAAAGAG<br>Reverse: AGTGCGGATGTGCTTAAGAGC        |
| <i>SEP3</i>      | Forward: GCATGCTTCGGACACTGGA<br>Reverse: GGCCTCTCTTGAAGGCACATT           |
| <i>AP3</i>       | Forward: GAGTGTTTGGACGAGCTTGACA<br>Reverse CGCGAACGAGTTTGAAGTGTT         |
| <i>AG</i>        | Forward: CAACCGTTTGATTCACGGAA<br>Reverse: GGCGGATGAGTAATGGTGATTG         |
| <i>PI</i>        | Forward: AAAATCTGATGGCTGTTCGAGC<br>Reverse: CCATCTGGTGGTCTCGGACT         |
| <i>SPL4</i>      | Forward: GTAGCATCAATCGTGGTGGC<br>Reverse: CTTCGCTCATTGTGTCCAGC           |
| <i>PRE1</i>      | Forward: CTTGGTCGTTTCCTTTTCAGCA<br>Reverse: TTGATTATCGGAGATCCTTGGAG      |
| <i>EXL4</i>      | Forward: ACAGCAGGTCCTTCAAGAGCA<br>Reverse: CCCAACGGTATCACTCCCATTA        |
| <i>EXL6</i>      | Forward: CGCTTTTGGCTTTTGGTGATTC<br>Reverse: AACCTTCGGCAACTATATCGGT       |
| <i>CYP77A6</i>   | Forward: CGCTGCGTTTTGTATTCTTTTG<br>Reverse: AACTTGTTTACAACGAACCTCG       |
| <i>ACS2</i>      | Forward: ACATCGCTAATTTCCAAGACTACCA<br>Reverse: CTCTATCAAATGCGGCATAGTACG  |

**Average rosette leaf numbers of WT and *GsWRKY20ox* plants at the time of flowering under GA3 treatment.**

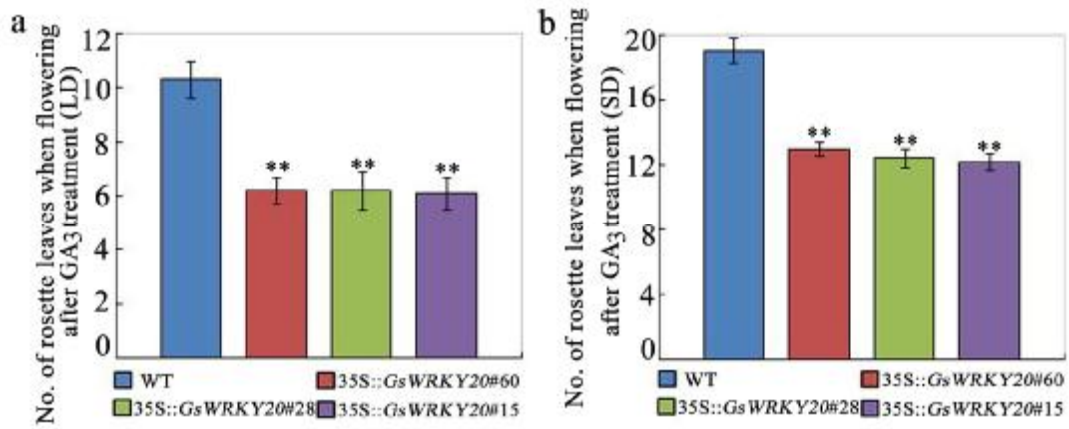

All values are means ( $\pm$ S.E.) from three independent experiments (at least 30 seedlings per experiment). Data were analyzed statistically using the t-test, double asterisks indicate significant differences from the corresponding WT at  $P < 0.01$ .
